# Supplementary material
Source: PubMed Central journal article supplement (PMC7100912)
Supplement: EMS85677-supplement-Supplementary_table_9.pdf [file EMS85677-supplement-Supplementary_table_9.pdf]

**Supplementary Table 9. Reagents used in this study.**

**Antibodies**

| <b>Antibody</b>                                                      | <b>Company</b>                                      | <b>Catalogue number</b>            |
|----------------------------------------------------------------------|-----------------------------------------------------|------------------------------------|
| $\alpha$ GM-CSF (PerCp/Cy5.5)                                        | Biologend                                           | 502311                             |
| $\alpha$ IL-2 (APC)                                                  | Biologend                                           | 500310                             |
| $\alpha$ IL-17A (bv605)                                              | Biologend                                           | 512325                             |
| $\alpha$ IL-22 (PE)                                                  | Biologend                                           | 366703                             |
| $\alpha$ IFN $\gamma$ (APC/Cy7)                                      | Biologend                                           | 502530                             |
| $\alpha$ IL-10 (bv421)                                               | Biologend                                           | 501421                             |
| $\alpha$ FoxP3 (eFluor 660)                                          | eBioscience                                         | 50-4777-42 (clone 236A/E7)         |
| $\alpha$ TNF $\alpha$ (FITC)                                         | Biologend                                           | 502906                             |
|                                                                      |                                                     |                                    |
| $\alpha$ CD4 (PE-TR)                                                 | Invitrogen                                          | MHCD0417                           |
| $\alpha$ CD25 (PC5)                                                  | Beckman Coulter                                     | IM2646                             |
| $\alpha$ CD45RA (QD655)                                              | Invitrogen                                          | Q10069                             |
| $\alpha$ CCR7 (bv421)                                                | Biologend                                           | 353208                             |
|                                                                      |                                                     |                                    |
| $\alpha$ CD4 (FITC)                                                  | Beckman Coulter                                     | A07750                             |
| $\alpha$ CD25 (PE)                                                   | Biologend                                           | 356103                             |
| $\alpha$ CD127 (PE-CF594)                                            | BD Pharmingen                                       | 562397                             |
| $\alpha$ CCR6 (QD605)                                                | Biologend                                           | 353420                             |
| $\alpha$ CXCR3 (APC)                                                 | BD Pharmingen                                       | 550967                             |
| $\alpha$ CCR4 (PE-Cy7)                                               | BD Pharmingen                                       | 557864                             |
| $\alpha$ CXCR3 (AlexaFluor647)                                       | Biologend                                           | 353712                             |
| $\alpha$ CCR6 (BV605)                                                | Biologend                                           | 353420                             |
|                                                                      |                                                     |                                    |
| $\alpha$ CD3 (TR66)                                                  | Recombinant antibody, provided by in-house facility |                                    |
| $\alpha$ CD28                                                        | BD Pharmingen                                       | 555725                             |
|                                                                      |                                                     |                                    |
| PE-Cy7 Mouse anti-NF- $\kappa$ B p65 (pS529)                         | BD Biosciences                                      | 560335 (Clone K10-895.12.50 (RUO)) |
| Anti-Human/Mouse phospho-I $\kappa$ B $\alpha$ (S32/S36) eFluor® 660 | eBioscience                                         | 50-9035-41                         |
|                                                                      |                                                     |                                    |
| <b>Western blot antibodies</b>                                       |                                                     |                                    |
| $\alpha$ DEC1 (S-8)                                                  | SantaCruz                                           | sc-101023 (mouse)                  |
| $\alpha$ FLAG                                                        | Sigma-Aldrich                                       | F1804                              |
| $\alpha$ GAPDH                                                       | Millipore                                           | MAB374                             |
|                                                                      |                                                     |                                    |
| $\alpha$ -rabbit-HRP (goat)                                          | Sigma                                               | A0545                              |
| $\alpha$ -mouse-HRP (goat)                                           | Southern Biotech                                    | 1031-05                            |
|                                                                      |                                                     |                                    |
| $\alpha$ NF- $\kappa$ B p65 Antibody (C-20)                          | SantaCruz                                           | sc-372                             |
| $\alpha$ NF- $\kappa$ B p65 (phospho S536)                           | Abcam                                               | ab76302                            |

**Primers for SYBR qPCR**

| <b>Target gene</b> | <b>Primer fw</b>           | <b>Primer rv</b>          |
|--------------------|----------------------------|---------------------------|
| <i>CSF2</i>        | 5'-TGTGAATGCCATCCAGGAGG-3' | 5'-GCTTGTACAGCTCCAGGCG-3' |

|                           |                             |                             |
|---------------------------|-----------------------------|-----------------------------|
| <i>BHLHE40</i>            | 5'-ATTGCCCTGCAGAGTGGTTT-3'  | 5'-GATACTGAAGCACCTCCCGG-3'  |
| <i>IL10</i>               | 5'-CCAAGACCCAGACATCAAGG-3'  | 5'-GGCCTTGCTCTTGTTCAC-3'    |
| <i>IL22</i>               | 5'-TGCAAAAGCTGAAGGACACA-3'  | 5'-TTTGCTCTGGTCAAATGCAG-3'  |
| <i>CTLA4</i>              | 5'-TTCATCCCTGTCTTCTGCAA-3'  | 5'-AGTGGCTTTGCCTGGAGAT-3'   |
| <i>TIGIT</i>              | 5'-GTCATCTGCACAGCAGTCATC-3' | 5'-TCCTGTCCAGCTGATTTTCTC-3' |
| <i>IL23R</i>              | 5'-TACTGGCAGCCTTGGAGTTC-3'  | 5'-TGCCCTGTAGAGATGGAAGC-3'  |
| <i>IL2</i>                | 5'-CCCAGGGACTTAATCAGCAA-3'  | 5'-GGTTGCTGTCTCATCAGCAT-3'  |
| <i>IFNG</i>               | 5'-CGAGATGACTTCGAAAAGCTG-3' | 5'-CAGTTCAGCCATCACTTGA-3'   |
| <i>IL17A</i>              | 5'-CCACCTCACCTTGGAAATCTC-3' | 5'-TGGTAGTCCACGTTCCCATC-3'  |
| <i>TNF</i>                | 5'-TCAGCCTCTTCTCCTTCCTG-3'  | 5'-GCCAGAGGGCTGATTAGAGA-3'  |
| <i>ZC3H12D</i>            | 5'-TCCTGGCAGCATTGTCCTTA-3'  | 5'-TCTCCGGGTGGTAGAACTTG-3'  |
| <i>ZC3H12A</i>            | 5'-CCACTCCAGAAGAGGAAAA-3'   | 5'-CGCTCCAGAAACCAGTTCAC-3'  |
|                           |                             |                             |
| <b>Endogenous control</b> |                             |                             |
| <i>UBE2D2</i>             | 5'-GATCACAGTGGTCTCCAGCA-3'  | 5'-CGAGCAATCTCAGGCACTAA-3'  |

### Taqman probes

| Target genes               | Probe ID      |  |
|----------------------------|---------------|--|
| <i>CSF2</i>                | Hs00929873 m1 |  |
| <i>BHLHE40</i>             | Hs01041212 m1 |  |
| <i>RORC</i>                | Hs01076122 m1 |  |
| <i>AHR</i>                 | Hs00168233 m1 |  |
| <i>FOXP3</i>               | Hs00203958 m1 |  |
| <i>TBX21</i>               | Hs00894392 m1 |  |
| <i>IL23R</i>               | Hs00332759 m1 |  |
|                            |               |  |
| <b>Endogenous control</b>  |               |  |
| <i>TBP</i>                 | Hs99999910 m1 |  |
|                            |               |  |
| <b>Target miRNAs</b>       |               |  |
| miR-146a                   | Hs 000468     |  |
| miR-181a                   | Hs 000480     |  |
|                            |               |  |
| <b>Endogenous controls</b> |               |  |
| RNU24                      | Hs 001001     |  |
| RNU48                      | Hs 001006     |  |

### Cloning primers

| Name                     | sequence                                              |
|--------------------------|-------------------------------------------------------|
| BHLHE40 in Lenti-puro fw | 5'-AATATTCTAGAATGGAGCGGATCCCCAGCGC-3'                 |
| BHLHE40 in Lenti-puro rv | 5'-TTATAGAATTCGTCTTTGGTTTCTAAGTTTAAAGGGGGGATTGG-3'    |
| BHLHE40 in Lenti-GFP fw  | 5'-AATATGAATTCATGGAGCGGATCCCCAGCGC-3'                 |
| BHLHE40 in Lenti-GFP rv  | 5'-TTATATCTAGATTAGTCTTTGGTTTCTAAGTTTAAAGGGGGGATTGG-3' |
|                          |                                                       |

|                             |                                                                                                                             |
|-----------------------------|-----------------------------------------------------------------------------------------------------------------------------|
| BHLHE40-1-297-stop fw       | 5'-GCAGCTTTCGGATGATtAAGGCCATTTtagAGCAGTGACCTGATC-3'                                                                         |
| BHLHE40-1-297-stop rv       | 5'-GATCAGGTCACCTGCTctaGAAATGGCCTTaATCATCCGAAAGCTGC-3'                                                                       |
|                             |                                                                                                                             |
| FlagHA into BHLHE40-GFP fw  | 5'-AATAAGAATTCGCCACCATGGACTACAAGGAC-3'                                                                                      |
| FlagHA into BHLHE40-GFP rv  | 5'-AATAAGAATTCTCCGGCGTAGTCGGGCAC-3'                                                                                         |
| miR146-fw-sponge PCR        | 5'-AACCCATGGACAGAGTTCTCACCGT-3'                                                                                             |
| miR146-rv-sponge PCR        | 5'-CTGTCCATGGGTACGGTGAGAACT-3'                                                                                              |
|                             |                                                                                                                             |
| BHLHE40_binding site        | 5'-GGTACCGAGCTCTTACGCGTGCTAGCAATCCTTGTGTCACGTGACA<br>CAAGGATTGCTAGACGTCACGTGACACAAGGATTGCTAGCCCCGGGCTCGA<br>GATCTGCGATCT-3' |
| ZC3H12D Promoter Nhe        | 5'-AATAAGCTAGCCTGATCATCTTCTCAGCTGGAGG-3'                                                                                    |
| ZC3H12D Promoter Xho        | 5'-TTATTCTCGAGCTCCTCCTGCCTCTGCCCG-3'                                                                                        |
|                             |                                                                                                                             |
| TNFa-3'UTR-pmirGLO NheI FW  | 5'-ATATGCTAGCGGAGGACGAACATCCAACCTTC-3'                                                                                      |
| TNFa-3'UTR-pmirGLO XbaI rv  | 5'-ATTCTAGATCTCGCCACTGAATAGTAGGGC-3'                                                                                        |
| IL22-3'UTR-pmirGLO EcoRI FW | 5'-AAAGAATTCCAGAGCAAAGCTGAAAAATG-3'                                                                                         |
| IL22-3'UTR-pmirGLO XbaI rv  | 5'-ATCTCTAGATTAGGATATCCAAGTGTTTATTG-3'                                                                                      |
|                             |                                                                                                                             |
| ZC3H12D D95N mutagenesis FW | 5'-GCGACCCATAGTGATTAATGGCAGCAACGTGGCGATG-3'                                                                                 |
| ZC3H12D D95N mutagenesis RV | 5'-CATCGCCACGTTGCTGCCATTAATCACTATGGGTCGC-3'                                                                                 |

### miRNA mimics

| name                               | Company           | Sequence / catalogue number |
|------------------------------------|-------------------|-----------------------------|
| siGLO green transfection indicator | Fisher Scientific | Catalogue number 11537220   |
|                                    |                   |                             |
| miR146a mimic                      | Exiqon            | Catalogue number 472124-001 |
| miRNA mimic negative control       | Exiqon            | Catalogue number 479903-001 |

### Plasmids

| Plasmid name | Comment                                            |
|--------------|----------------------------------------------------|
| empty LV     | pScalps with puromycin cassette                    |
| empty GFP    | pLVX-EF1 $\alpha$ -IRES-ZsGreen1 (Clontech 631982) |

|                                             |                                                                                      |
|---------------------------------------------|--------------------------------------------------------------------------------------|
| empty FlagHA-GFP                            | pLVX-EF1 $\alpha$ -FlagHA-IRES-ZsGreen1                                              |
| BHLHE40-LV                                  | pScalps- BHLHE40                                                                     |
| BHLHE40-1-297-stop-LV                       | pScalps- BHLHE40-1-297                                                               |
| BHLHE40-GFP                                 | pLVX-EF1 $\alpha$ - BHLHE40-IRES-ZsGreen1                                            |
| FlagHA- BHLHE40-GFP                         | pLVX-EF1 $\alpha$ -FlagHA- BHLHE40-IRES-ZsGreen1                                     |
| mCherry-miR146a/sponge-LV                   | pScalps-miR146a/sponge-mCherry                                                       |
|                                             |                                                                                      |
| pLenti BHLHE40 plasmid                      | ABM LV089481, pLenti-GIII-EF1a                                                       |
| psPAX2                                      | Addgene 12260                                                                        |
| psMD2.G                                     | Addgene 12259                                                                        |
|                                             |                                                                                      |
| pGL4.74[hRluc/TK] (TK Renilla)              | Promega E6921                                                                        |
| pGL3-promoter Luciferase                    | Promega E1761                                                                        |
| pGL3-Luciferase-BHLHE40-4xbs                | Containing 4 consensus binding sites for BHLHE40                                     |
| pGL3-Basic Luciferase                       | Promega E1751                                                                        |
| pGL3-Basic Luciferase-ZC3H12D-Promoter      | Containing the <i>ZC3H12D</i> promoter                                               |
| pGL3-Enhancer Luciferase                    | Promega E1771                                                                        |
| pGL3-Enhancer Luciferase-ZC3H12D-Promoter   | Containing the <i>ZC3H12D</i> promoter                                               |
| pGL3-Basic Luciferase-ZC3H12D-Promoter MUT  | Containing the <i>ZC3H12D</i> promoter mutated in two putative BHLHE40 binding sites |
|                                             |                                                                                      |
| pmiRGLO Dual-Luciferase                     | Empty vector generated from Addgene 78131 plasmid                                    |
| pmiRGLO Dual-Luciferase- <i>TNF</i> -3'UTR  | Containing the 3'UTR of <i>TNF</i>                                                   |
| pmiRGLO Dual-Luciferase- <i>IL22</i> -3'UTR | Containing the 3'UTR of <i>IL22</i>                                                  |
| ZC3H12D-WT-eGFP                             | EF1 $\alpha$ -ZC3H12D-IRES-eGFP (Genecopoeia EX-Y4955-Lv165)                         |
| ZC3H12D-D95N-eGFP                           | Genecopoeia EX-Y4955-Lv165 containing ZC3H12D with D95N mutation                     |

### CRISPR-Cas9 deletion in primary T cells

| Name                  | Guide RNA sequence          | PAM       |
|-----------------------|-----------------------------|-----------|
| BHLHE40_Cas9_crRNA_gA | 5'-CCCGTCTTGACTTGTACACT-3'  | 5'-TGG-3' |
| BHLHE40_Cas9_gRNA_gB  | 5'-CTGGAGCACGGAGACCTACC-3'  | 5'-AGG-3' |
| BHLHE40_Cas9_gRNA_gC  | 5'-GCCAAAGGTTTCGGAAGGTCC-3' | 5'-TGG-3' |
| ZC3H12D_Cas9_crRNA_gA | 5'-CCTGGTCAACGACGTGCTGC-3'  | 5'-AGG-3' |
| ZC3H12D_Cas9_crRNA_gB | 5'-CACTATGGGTTCGAGAGAAC-3'  | 5'-TGG-3' |

### Primers for CRISPR-Cas9 knock-out screening

| Name                  | Sequence                      |
|-----------------------|-------------------------------|
| BHLHE40 Short-FW      | 5'-CTGGAGCACGGAGACCTACCAG-3'  |
| BHLHE40 Short-Rev     | 5'-CCCGTCTTGACTTGTACACTTGG-3' |
| ZC3H12D Short-FW      | 5'-CTGGTCAACGACGTGCTGCAGGA-3' |
| ZC3H12D Short-Rev     | 5'-CGCAGAGAACTGGCCAGGGTT-3'   |
| BHLHE40_T7EndoLong-FW | 5'-AACTGAAGCTGCATCTCAAAGC-3'  |
| BHLHE40_T7EndoLong-RV | 5'-CAAAGGACTGGGTGGAAAGG-3'    |

|                       |                                 |
|-----------------------|---------------------------------|
| ZC3H12D_T7EndoLong-FW | 5'-AGTCTGAGAAACAAGAAACCTGTGT-3' |
| ZC3H12D_T7EndoLong-RV | 5'-GTTAGGGACAGACTCCCAACAAG-3'   |

**Primers for mutagenesis of two putative BHLHE40 sites in the *ZC3H12D* promoter**

| Name              | Sequence                                             |
|-------------------|------------------------------------------------------|
| ZC3H12D site 1_FW | 5'-CTCACGGAGGGTTTGTGTTTgATccGGTTGCTGAACTTTGATTTCG-3' |
| ZC3H12D site 1_RV | 5'-CGAATCAAAGTTCAGCAACCggATcCAAAACAAACCTCCGTGAG-3'   |
| ZC3H12D site 2_FW | 5'-CCTCTGACTCCAGTGGgAtaTcGGGGCCTGGCCTCACT-3'         |
| ZC3H12D site 2_RV | 5'-AGTGAGGCCAGGCCCCgAtaTcCCACTGGAGTCAGAGG-3'         |
